# Supplementary material for: KRILLBASE: a circumpolar database of Antarctic krill and salp numerical densities, 1926–2016
Source: Copernicus journal article supplement (doi:10.5194/essd-2016-52), 2016-11-15
Supplement: Supplementary file 1 [file essd-2016-52-supplement.pdf]

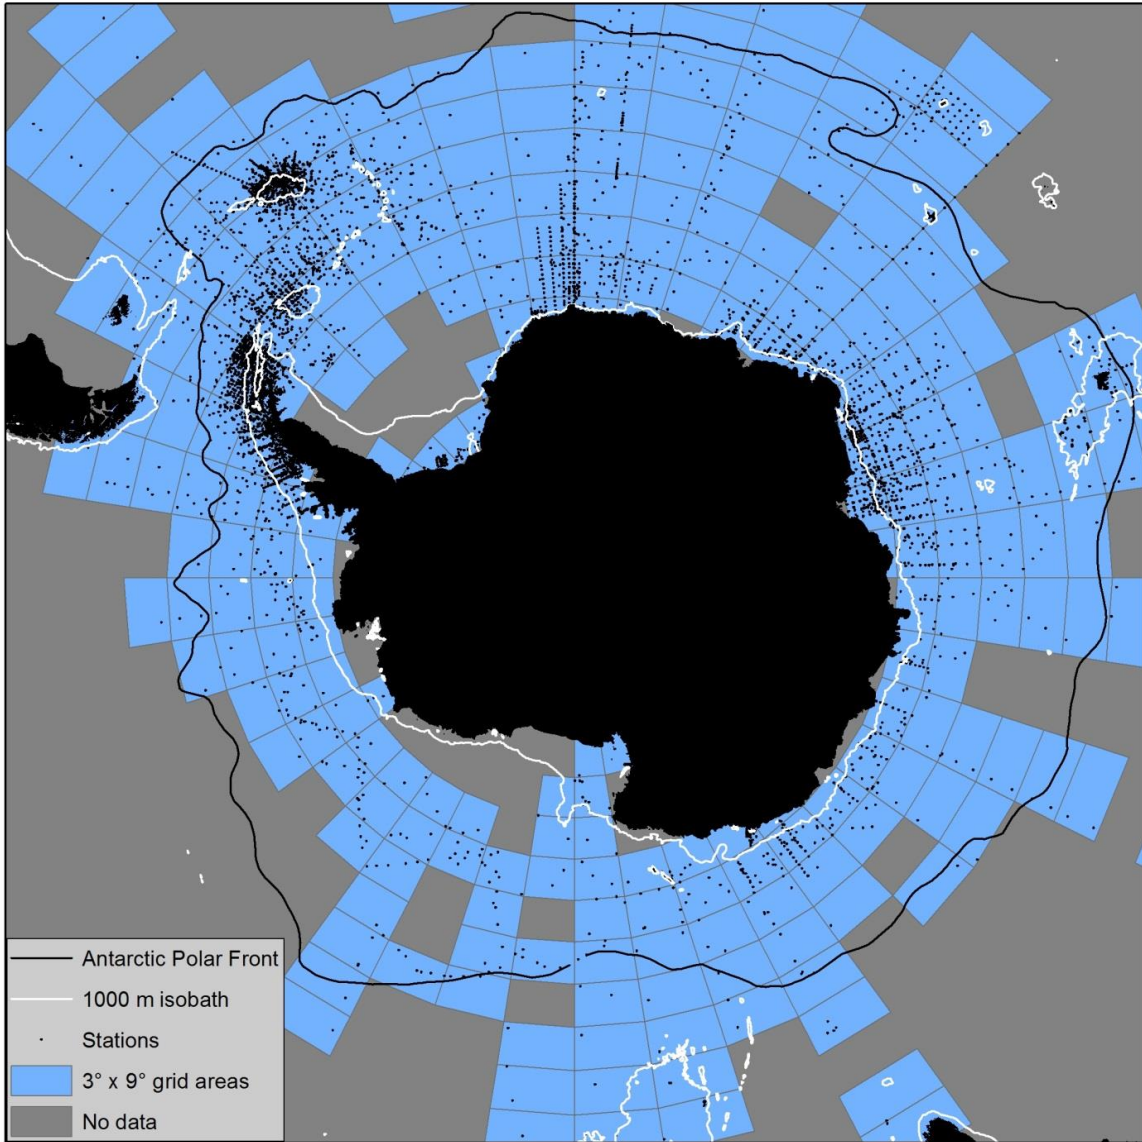

**Supplementary Fig. 1** Krill sampling stations overlaid on the same grid as used for Fig. 8 to illustrate the variable sampling coverage underlying these plots.

### Supplementary Fig 1
